# Supplementary material
Source: PubMed Central journal article supplement (PMC7261517)
Supplement: NIHMS1582289-supplement-Supplementary_Information.pdf [file NIHMS1582289-supplement-Supplementary_Information.pdf]

## Supporting Information

### Imaging GPCR Internalization Using Near-Infrared Nebraska Red-Based Reagents

Lauren Lesiak,<sup>a,†</sup> Xinqi Zhou,<sup>a,†</sup> Yuan Fang,<sup>a,b,†</sup> Jia Zhao,<sup>a</sup> Jon R. Beck,<sup>a</sup> and Cliff I. Stains<sup>a,b,c,d,\*</sup>

<sup>a</sup>Department of Chemistry, University of Nebraska – Lincoln, Lincoln, NE 68588 (USA)

<sup>b</sup>Department of Chemistry, University of Virginia, Charlottesville, VA 22904 (USA)

<sup>c</sup>Nebraska Center for Integrated Biomolecular Communication, University of Nebraska-Lincoln, Lincoln, NE 68588 (USA)

<sup>d</sup>Cancer Genes and Molecular Regulation Program, Fred & Pamela Buffet Cancer Center, University of Nebraska Medical Center, Omaha, NE 68198 (USA)

\*Corresponding author, Email: [cstains@virginia.edu](mailto:cstains@virginia.edu)

†These authors contributed equally to this work.

### Table of Contents

|                                                                                  |    |
|----------------------------------------------------------------------------------|----|
| Figure S1 .....                                                                  | 2  |
| Figure S2 .....                                                                  | 3  |
| Figure S3 .....                                                                  | 4  |
| Figure S4 .....                                                                  | 5  |
| Figure S5 .....                                                                  | 6  |
| Figure S6 .....                                                                  | 7  |
| Figure S7 .....                                                                  | 8  |
| Figure S8 .....                                                                  | 9  |
| Figure S9 .....                                                                  | 10 |
| Table S1 .....                                                                   | 12 |
| Movie Captions .....                                                             | 13 |
| Copies of <sup>1</sup> H, <sup>13</sup> C, and <sup>31</sup> P NMR spectra. .... | 14 |

Figure S1

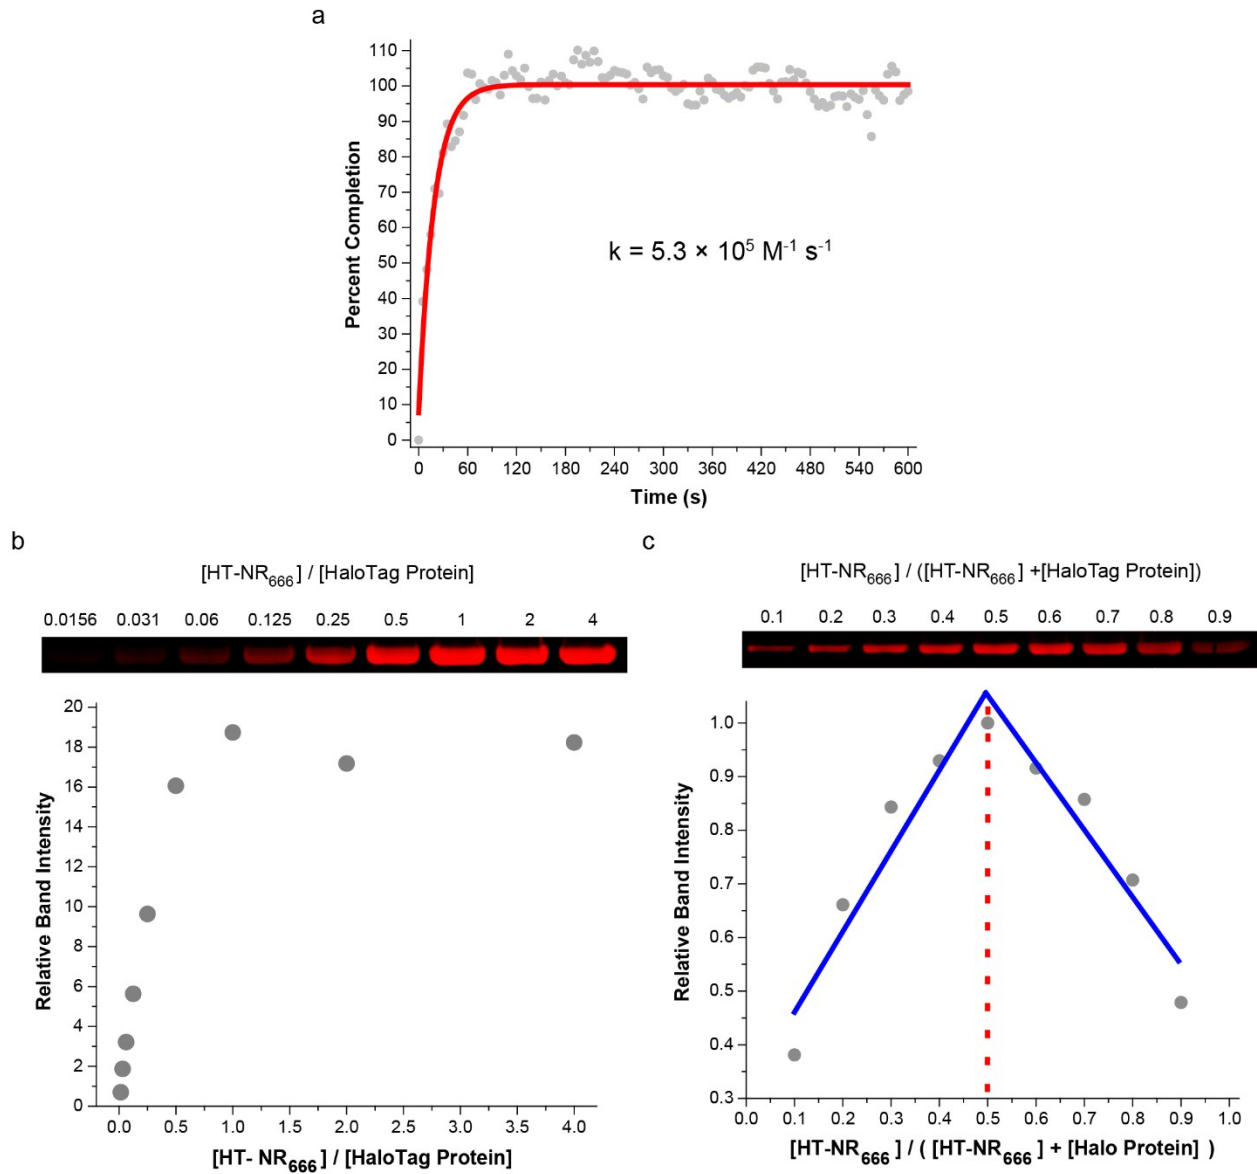

Evaluating HT-NR<sub>666</sub> labeling of recombinant His<sub>6</sub>-HaloTag protein *in vitro*. (a) Labeling kinetics measured by fluorescence polarization. SDS-PAGE gels imaged by in-gel fluorescence corresponding to labeling of His<sub>6</sub>-HaloTag with increasing concentrations of HT-NR<sub>666</sub> (b) as well as a Job's plot assay (c) demonstrate a 1:1 binding stoichiometry.

**Figure S2**

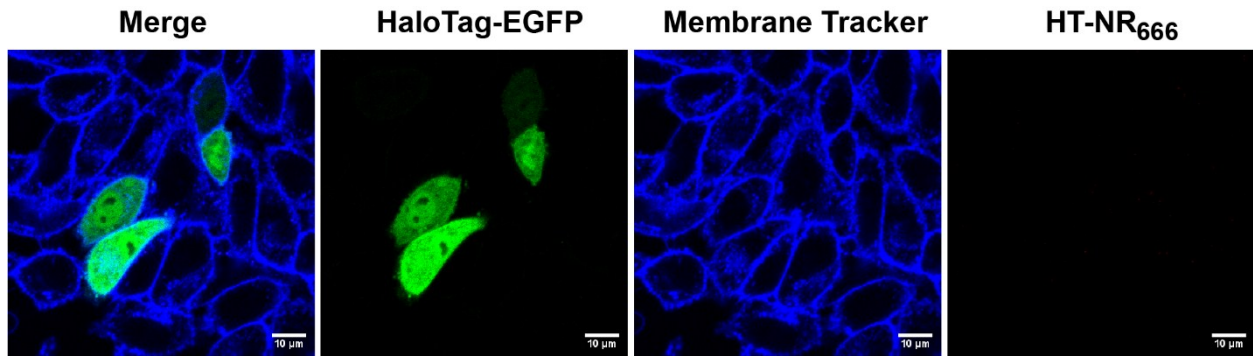

HT-NR<sub>666</sub> is not cell permeable. CHO cells were transfected with a HaloTag-EGFP construct and labeled with membrane tracker. After washing 3 times with DPBS, cells were loaded with 10 μM HT-NR<sub>666</sub> in HEPES buffered DMEM for 20 min. Images were taken in HEPES buffered DMEM after washing 3 times with DPBS.

Figure S3

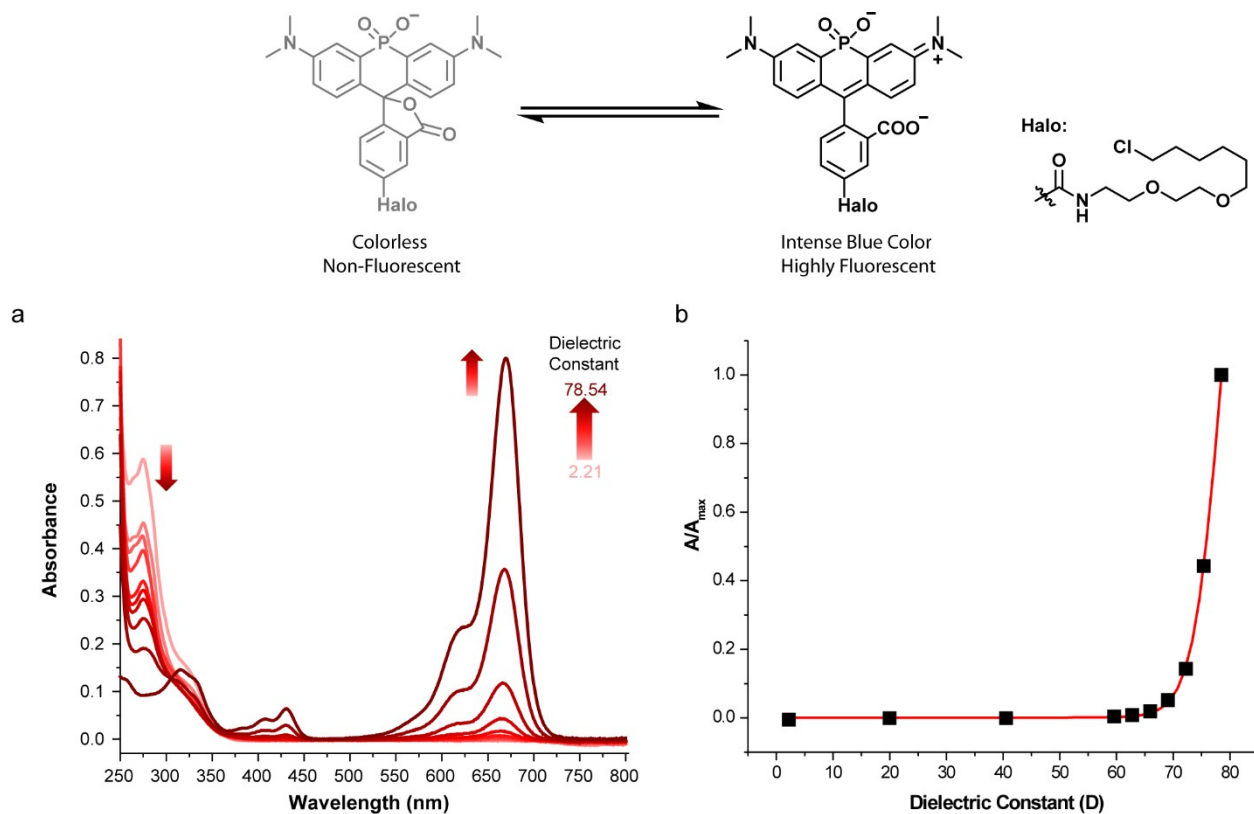

*In vitro* evaluation of the fluorogenic behavior for mHT-spiroNR<sub>666</sub>. (a) Absorbance spectrum of 10  $\mu\text{M}$  mHT-spiroNR<sub>666</sub> in water/dioxane mixtures with different dielectric constants. (b) The normalized absorption at 670 nm for mHT-spiroNR<sub>666</sub> across the indicated dioxane-water gradient.

**Figure S4**

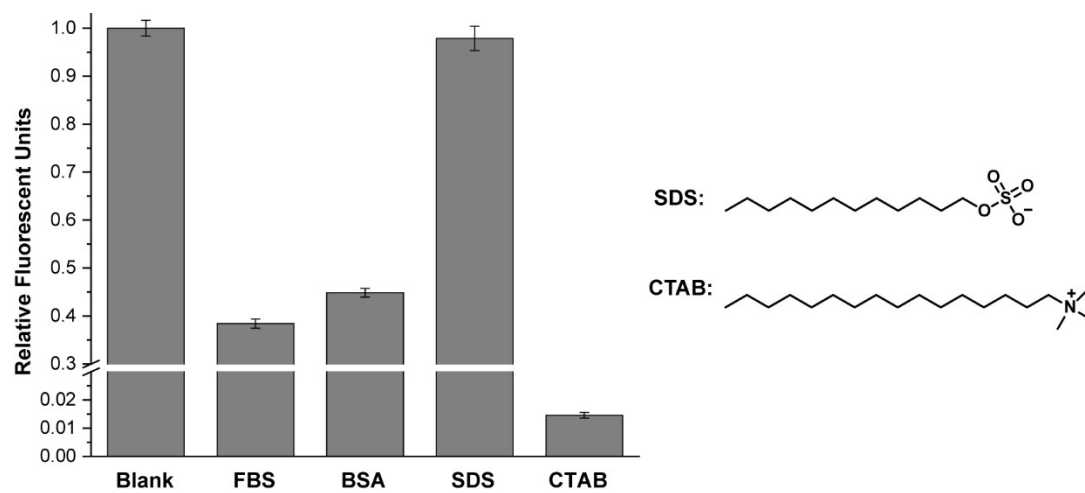

Normalized fluorescence intensity of mHT-spiroNR<sub>666</sub> (490 nM) in DPBS containing 10% FBS, BSA (2.3 mg/mL), SDS (1 mM), or CTAB (1 mM). Error bars represent the standard deviation of triplicate experiments.

Figure S5

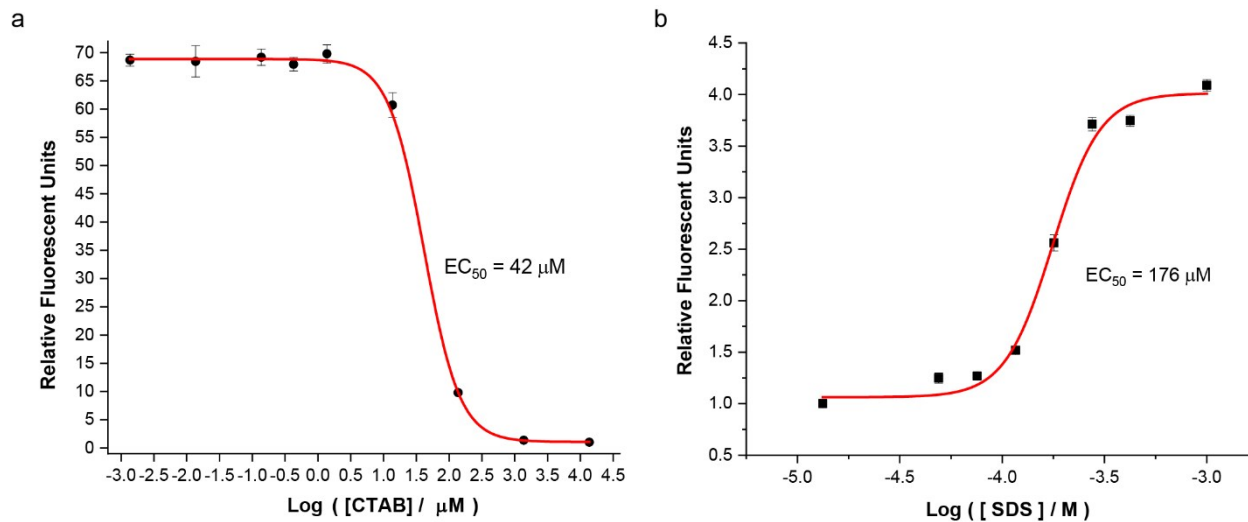

(a) The fluorescence of mHT-spiroNR<sub>666</sub> (490 nM) in the presence of increasing concentrations of CTAB. (b) The fluorescence of solutions containing BSA (2.3 mg/mL) and mHT-spiroNR<sub>666</sub> (490 nM) incubated with increasing concentrations of SDS. Error bars represent the standard deviation of triplicate experiments.

Figure S6

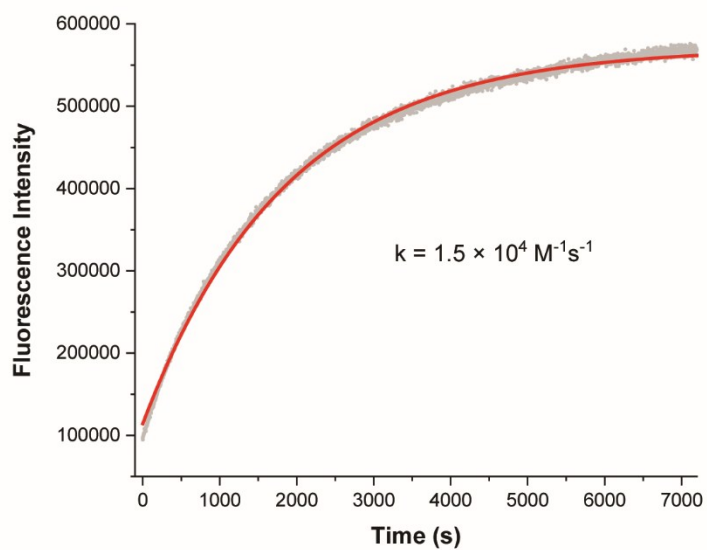

Labeling kinetics of mHT-spiroNR<sub>666</sub> (25 nM) with HaloTag-GST fusion protein (100 nM, Promega G4491) in PBS containing 10% FBS, measure by fluorescence turn-on (ex. = 669 nm and em. = 685 nm).

Figure S7

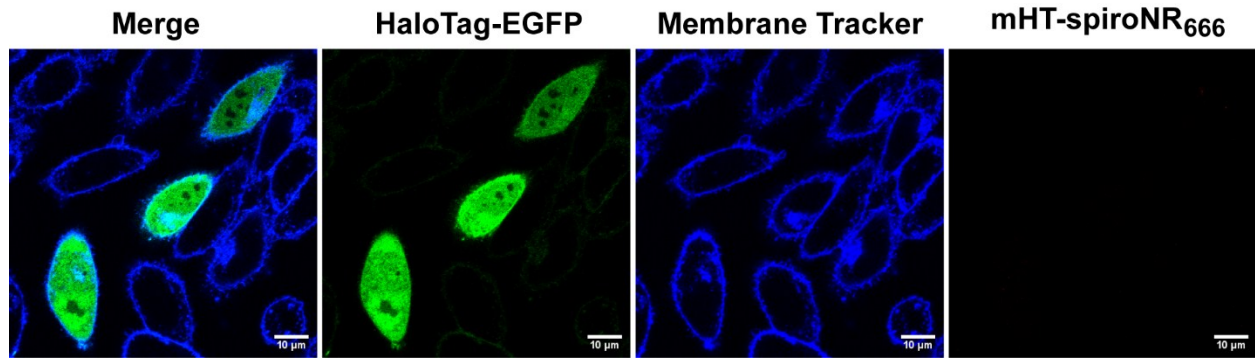

mHT-spiroNR<sub>666</sub> is not cell permeable. CHO cells were transfected with a HaloTag-EGFP construct and labeled with membrane tracker. After washing 3 times with DPBS, cells were loaded with 10 μM mHT-spiroNR<sub>666</sub> in HEPES buffered DMEM for 20 min. Images were taken in HEPES buffered DMEM after washing 3 times with DPBS.



Figure S8

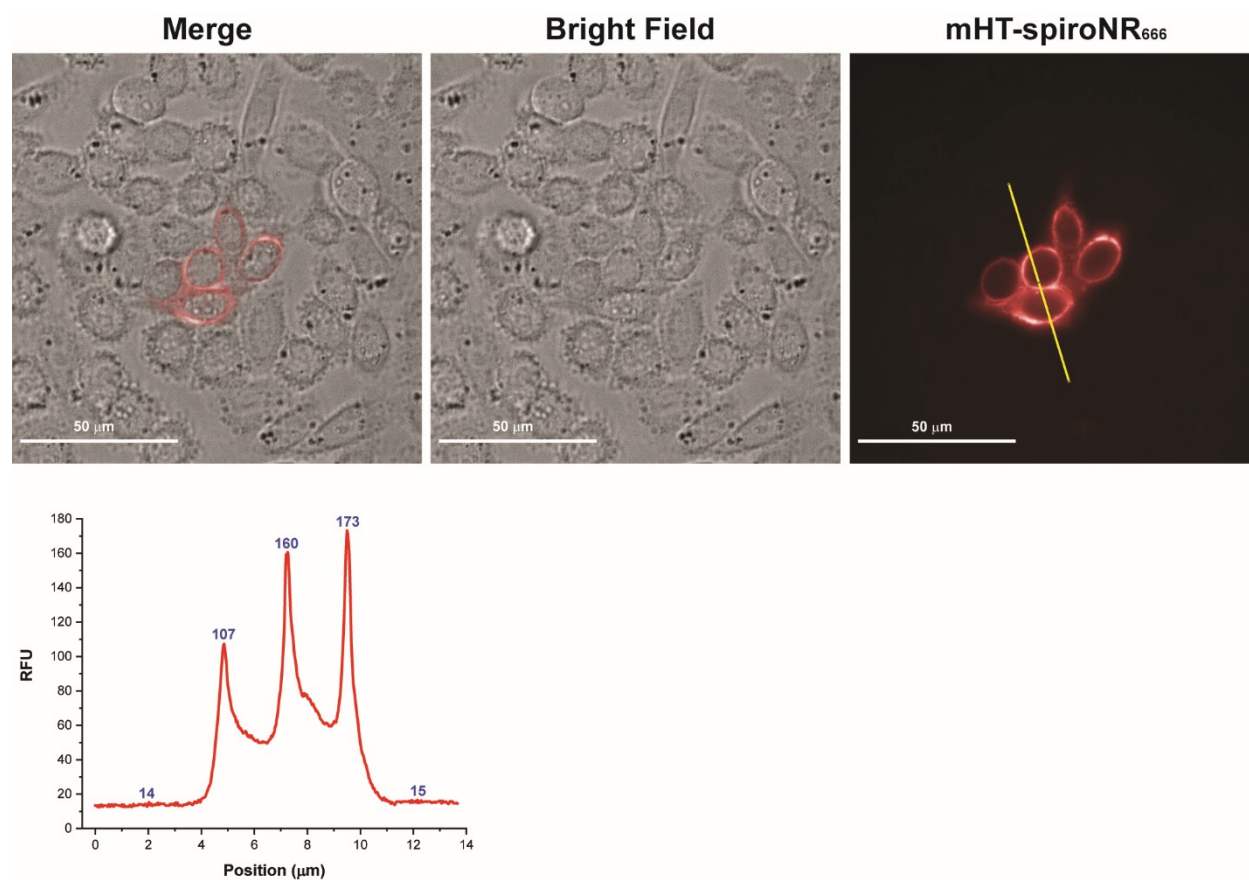

mHT-spiroNR<sub>666</sub> produces a clear fluorogenic signal using no-wash epifluorescence imaging. Epifluorescence images of CHO cells transiently transfected with HaloTag-hOX2R and labeled with 100 nM mHT-spiroNR<sub>666</sub>. Cells were grown on a 24-well, glass-bottom plate (MatTek, P24G-1.5-13-F) and imaged using the Alexa 633 channel of an Operetta CLS High-Content Imaging System (top). Fluorescence was quantified across the indicated region of interest (bottom). Scale bar: 50 μm.

Figure S9

HT-NR<sub>666</sub>

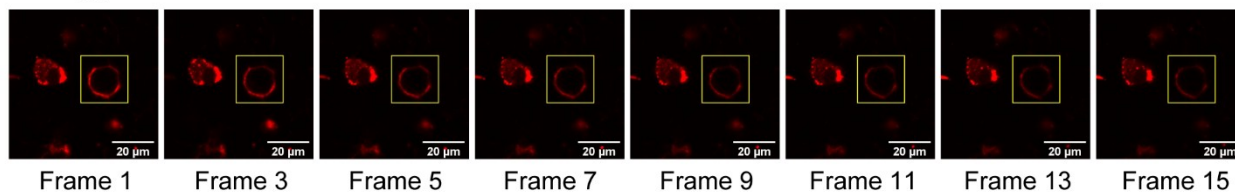

mHT-spiroNR<sub>666</sub>

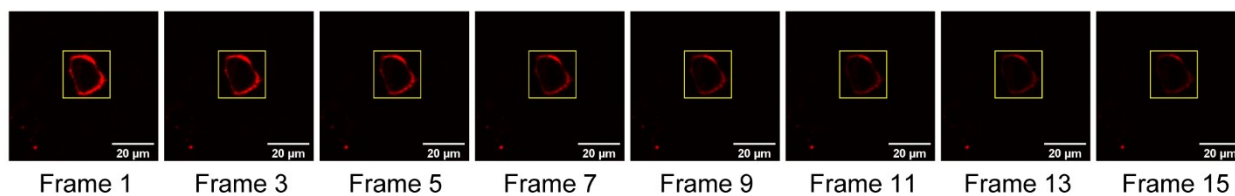

HT-sulfoCy5.5

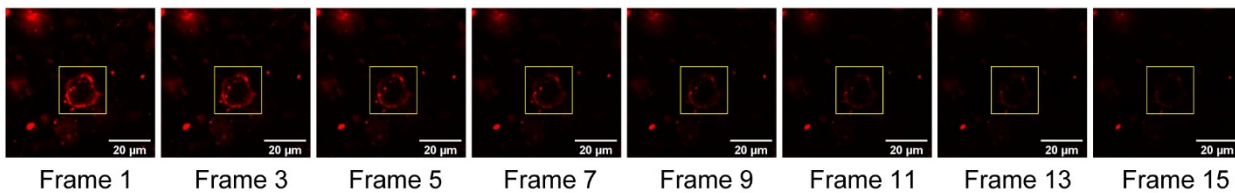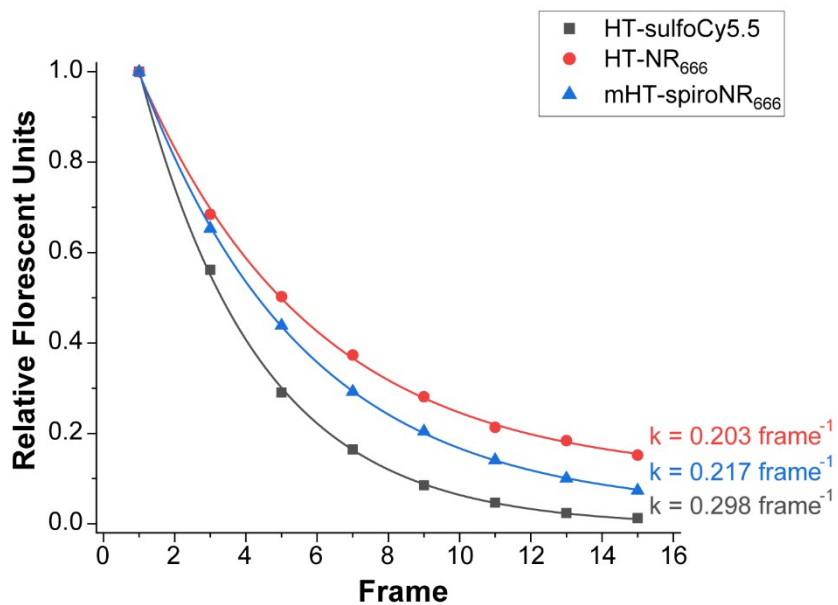

Comparison of photobleaching rates for HT-NR<sub>666</sub>, mHT-spiroNR<sub>666</sub>, and HT-sulfoCy5.5. CHO cells transiently transfected with HaloTag-hOX2R were labeled with the indicated probe (10  $\mu$ M). Cells were washed and imaged using laser scanning confocal microscopy at 5 seconds per frame using a 640 nm laser (2 mW) until fluorescence signal was lost. Regions of interest (ROI) are indicated by yellow squares. These ROIs were analyzed in ImageJ and fluorescence intensities were normalized to time zero. Changes in fluorescence over time were then fit to a first-order decay curve (see methods) yielding the bleaching rate constants ( $k$ ,  $r^2 > 0.999$  for each fit).

**Table S1****Photophysical properties of probes.**

| Dye                        | $\lambda_{ab}$ (nm) | $\lambda_{em}$ (nm) | $\epsilon$ ( $M^{-1}\cdot cm^{-1}$ ) | $\phi$ |
|----------------------------|---------------------|---------------------|--------------------------------------|--------|
| HT-NR <sub>666</sub>       | 671                 | 685                 | 80,367                               | 0.37   |
| mHT-spiroNR <sub>666</sub> | 669                 | 685                 | 62,200                               | 0.11   |

Measurements were conducted in PBS (pH = 7.4) with 0.5% DMSO. Sulfo-cyanine5.5 NHS ester (Lumiprobe) was used as the fluorescence reference standard (ex. = 670 nm, em. = 690 nm), which has a quantum yield of 0.237 in PBS at pH = 7.4.

## Movie Captions

Time-lapse live-cell imaging of CHO cells expressing HaloTag-hOX2R and labeled with HT-NR<sub>666</sub> (10  $\mu$ M). Cells were treated with orexin A (1  $\mu$ M, Movie S1) to stimulate receptor internalization or with DMSO (control, Movie S2). Cells were imaged every 30 seconds for 32.5 minutes. Scale bar: 10  $\mu$ m.

Copies of  $^1\text{H}$ ,  $^{13}\text{C}$ , and  $^{31}\text{P}$  NMR spectra.

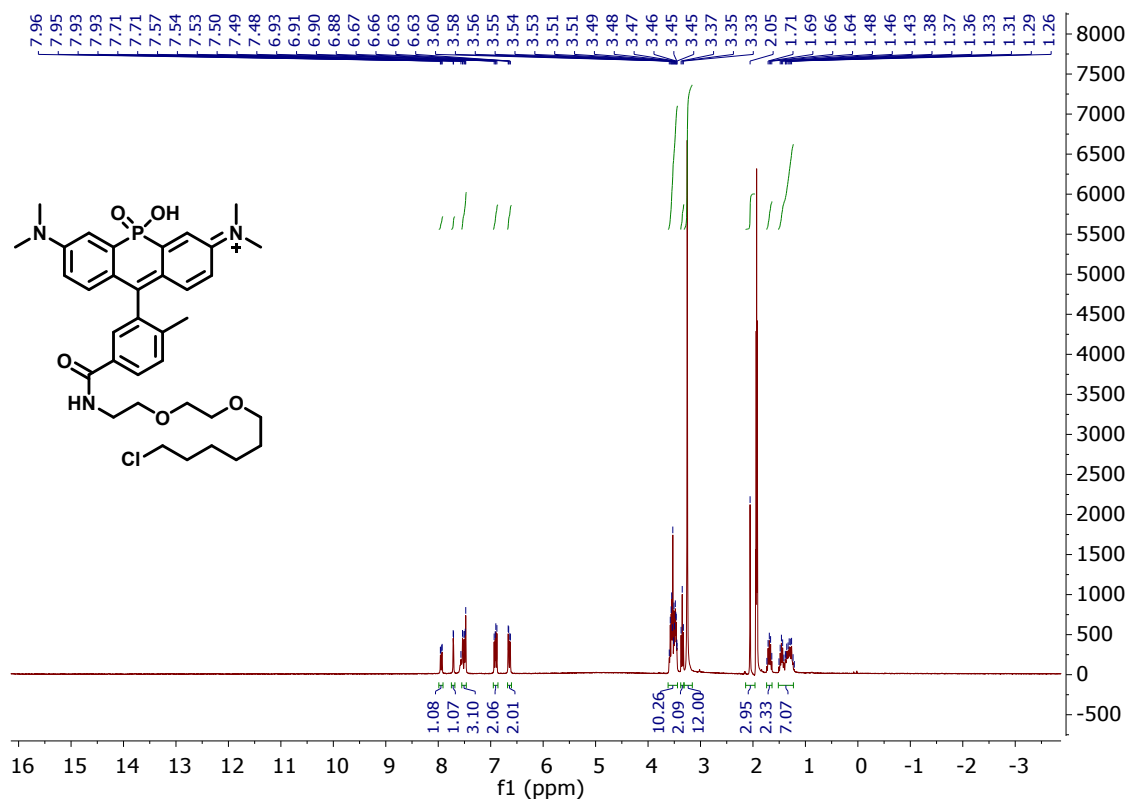

$^1\text{H}$  NMR chart of HT-NR<sub>666</sub> in CD<sub>3</sub>CN (300 MHz).

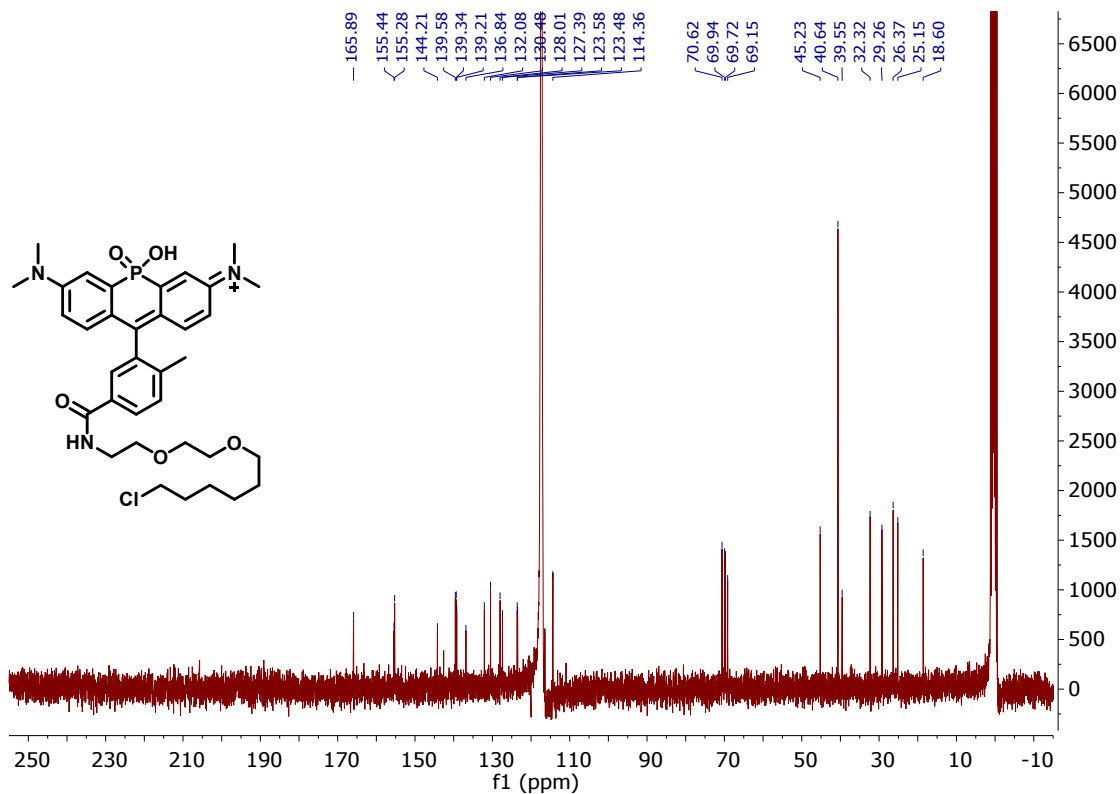

$^{13}\text{C}$  NMR chart of HT-NR<sub>666</sub> in CD<sub>3</sub>CN (75 MHz).

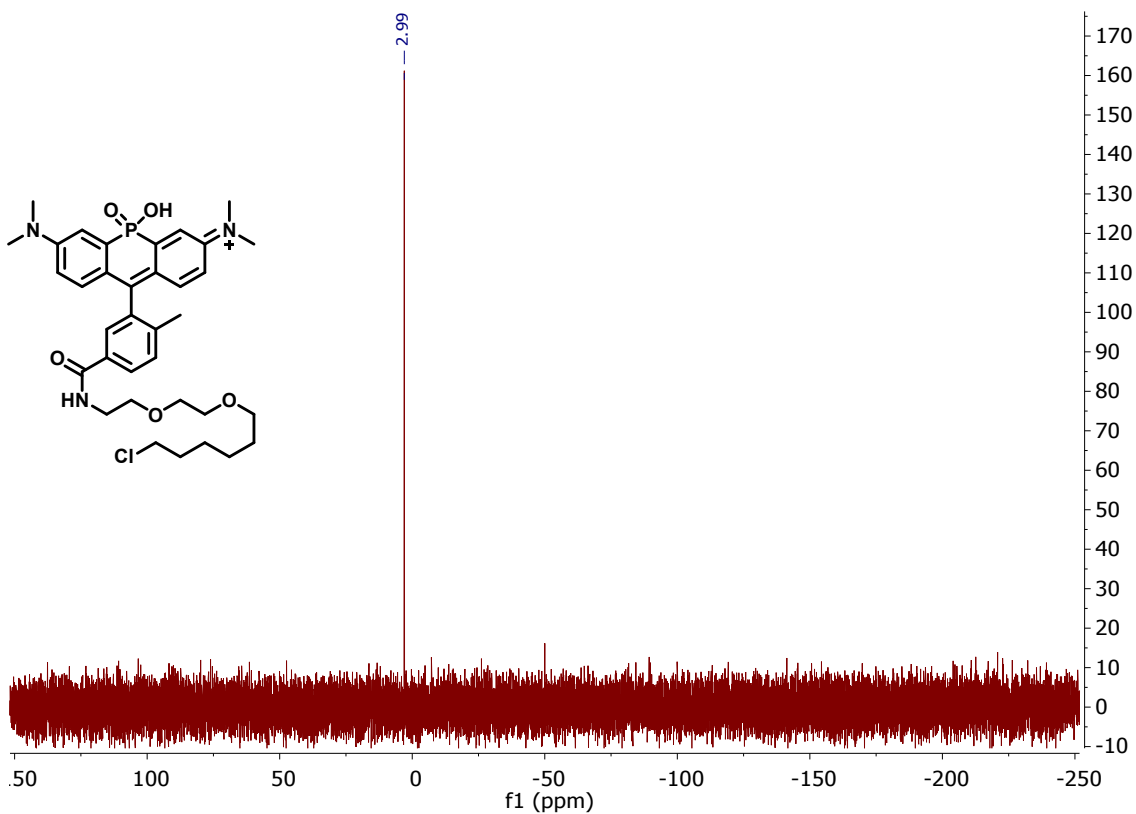

<sup>31</sup>P NMR chart of HT-NR<sub>666</sub> in CD<sub>3</sub>CN (121 MHz).

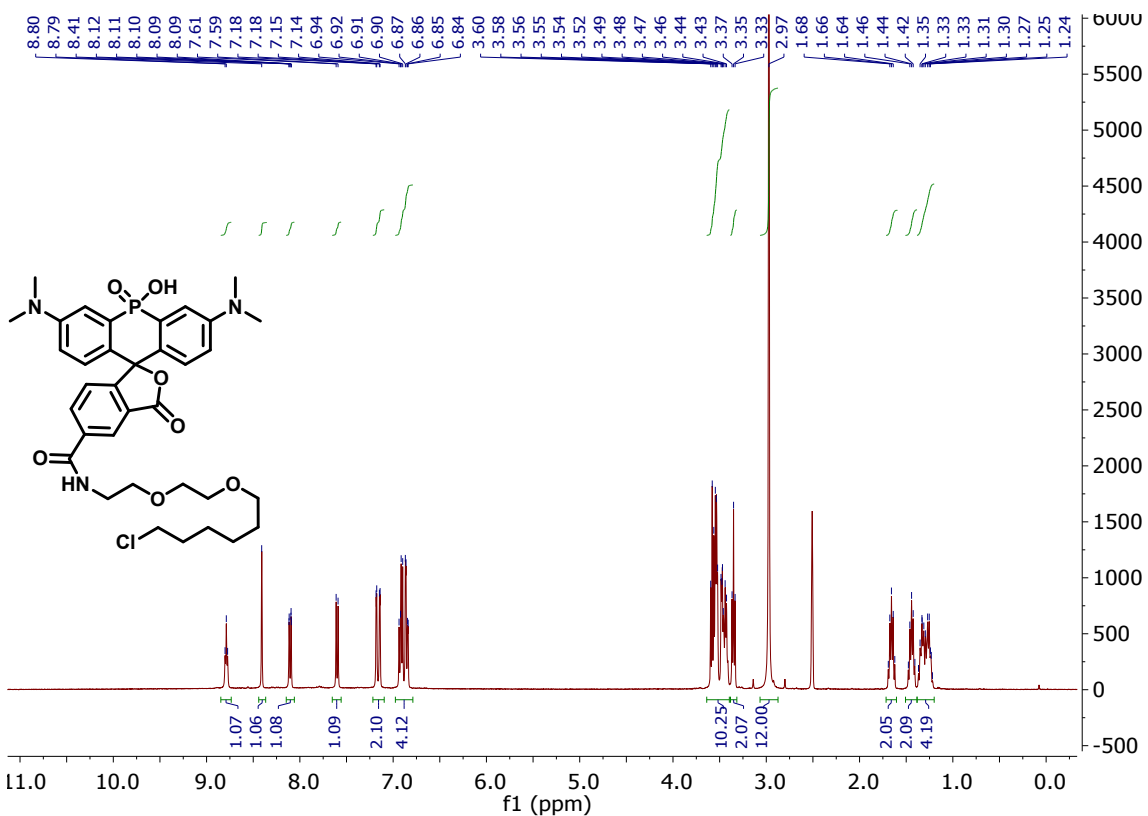

<sup>1</sup>H NMR chart of mHT-spiroNR<sub>666</sub> in DMSO-d<sub>6</sub> (400 MHz).

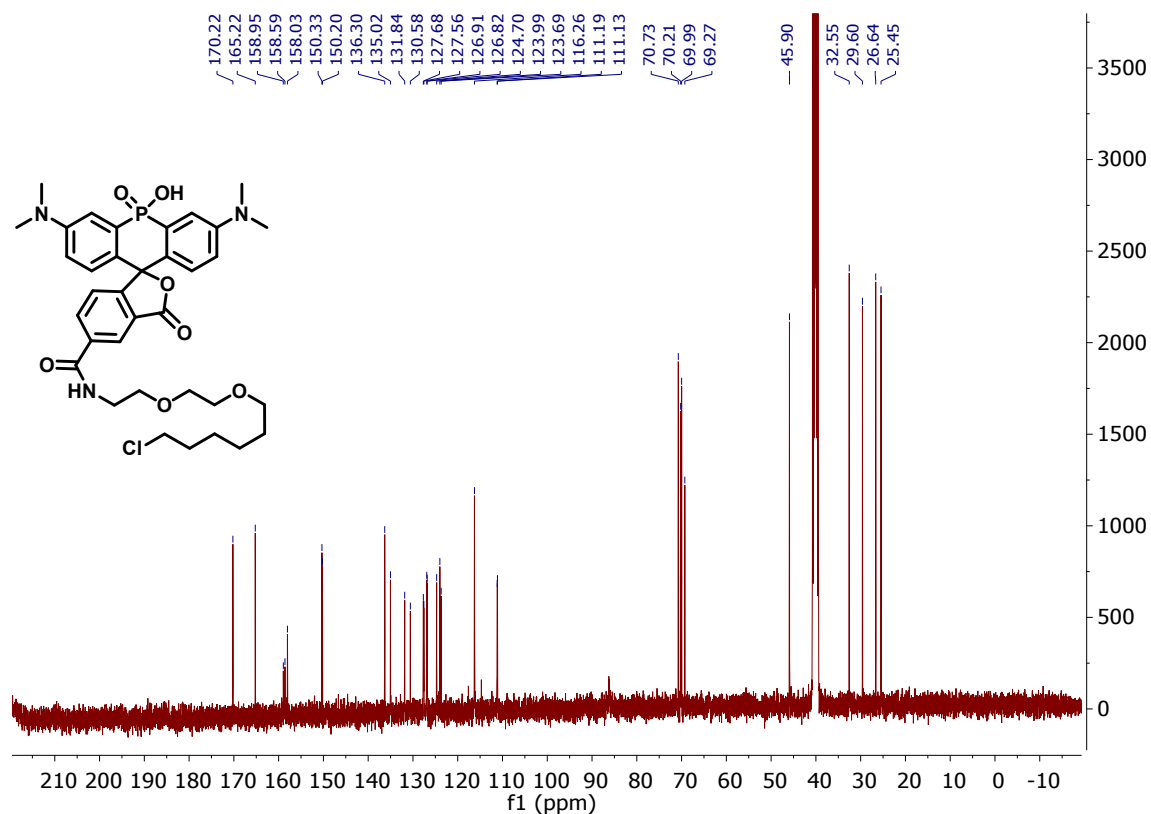

<sup>13</sup>C NMR chart of mHT-spiroNR<sub>666</sub> in DMSO-d<sub>6</sub> (101 MHz).

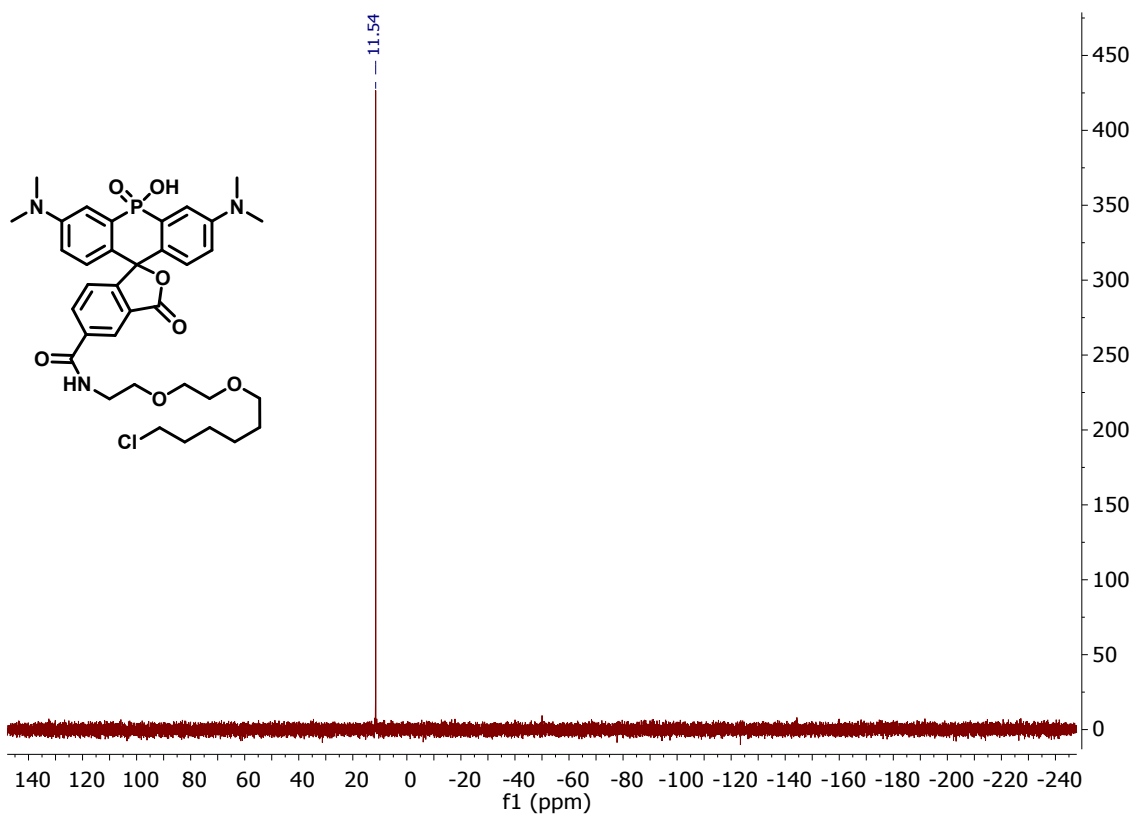

<sup>31</sup>P NMR chart of mHT-spiroNR<sub>666</sub> in DMSO-d<sub>6</sub> (162 MHz).
